# Supplementary material for: Inhibition of Wnt/beta-catenin signaling downregulates expression of aldehyde dehydrogenase isoform 3A1 (ALDH3A1) to reduce resistance against temozolomide in glioblastoma in vitro
Source: PubMed Central journal article supplement (PMC5978259; doi:10.18632/oncotarget.25210), 2018-04-27
Supplement: oncotarget-09-22703-s001.pdf [file oncotarget-09-22703-s001.pdf]

## Inhibition of Wnt/beta-catenin signaling downregulates expression of aldehyde dehydrogenase isoform 3A1 (ALDH3A1) to reduce resistance against temozolomide in glioblastoma *in vitro*

### SUPPLEMENTARY MATERIALS

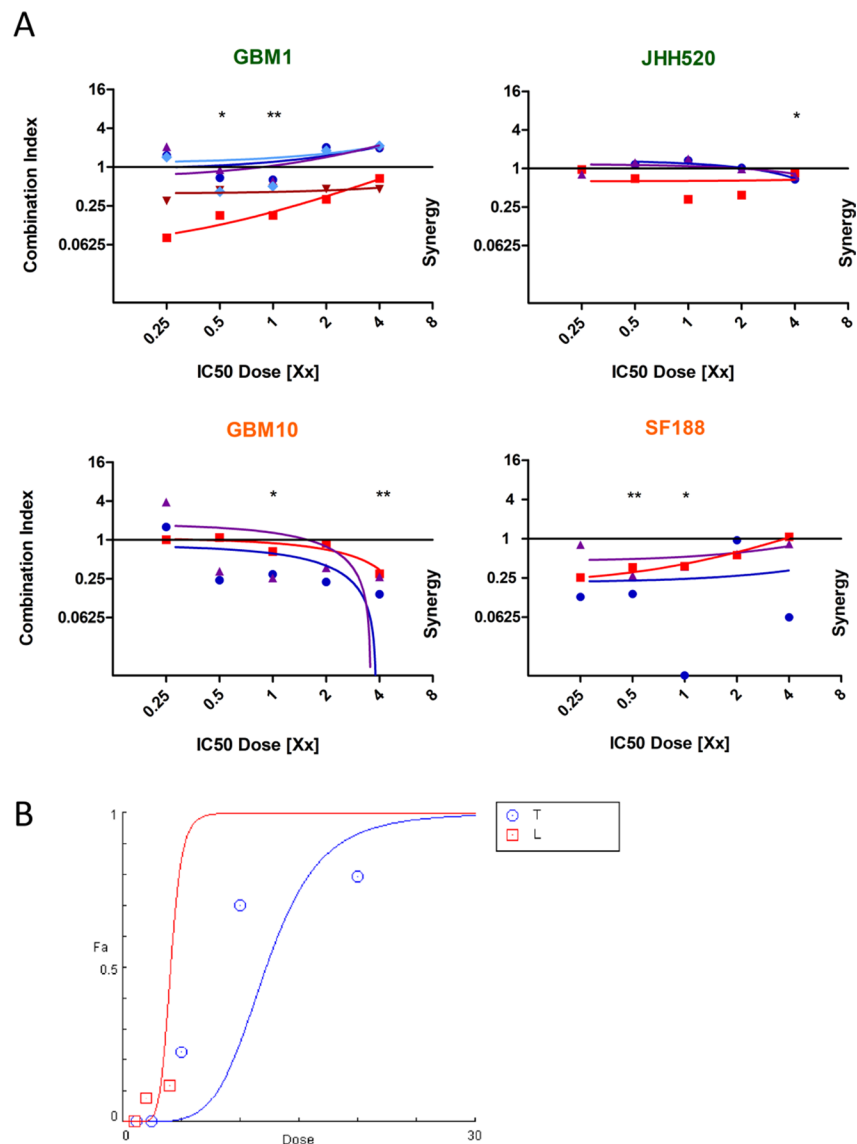

**Supplementary Figure 1:** (A) LGK974 acts synergistically in combination with  $\gamma$ -irradiation. The x-axis represents different multiples of the detected  $IC_{50}$  dose for each treatment and cell line. The axis of ordinates demonstrates the calculated combination index. The combination index is calculated based on the median-effect equation, taking each value from  $\gamma$ -irradiation, LGK974 single treatment and combination of both treatments for one specific dose into account. In one experiment, the combination index is calculated for five different doses and represented by one colored line. If the combination index is less than 1, both treatments act synergistically. If it is equal 1, both treatments act additively. If the combination index is more than 1, the effects are antagonistic. Each color represents one independent experiment (GBM1  $n = 5$  independent experiments; JHH520, GBM10 and SF188  $n = 3$  independent experiments). MGMT methylated cell lines presented in green, MGMT unmethylated cell lines presented in orange. (B) Dose-effect curve of TMZ and LGK974 in GBM1. Effect (Fa) is represented on the axis of ordinates; dose is represented on the x-axis on linear scales. D: DMSO; T: TMZ; I:  $\gamma$ -irradiation; L: LGK974.

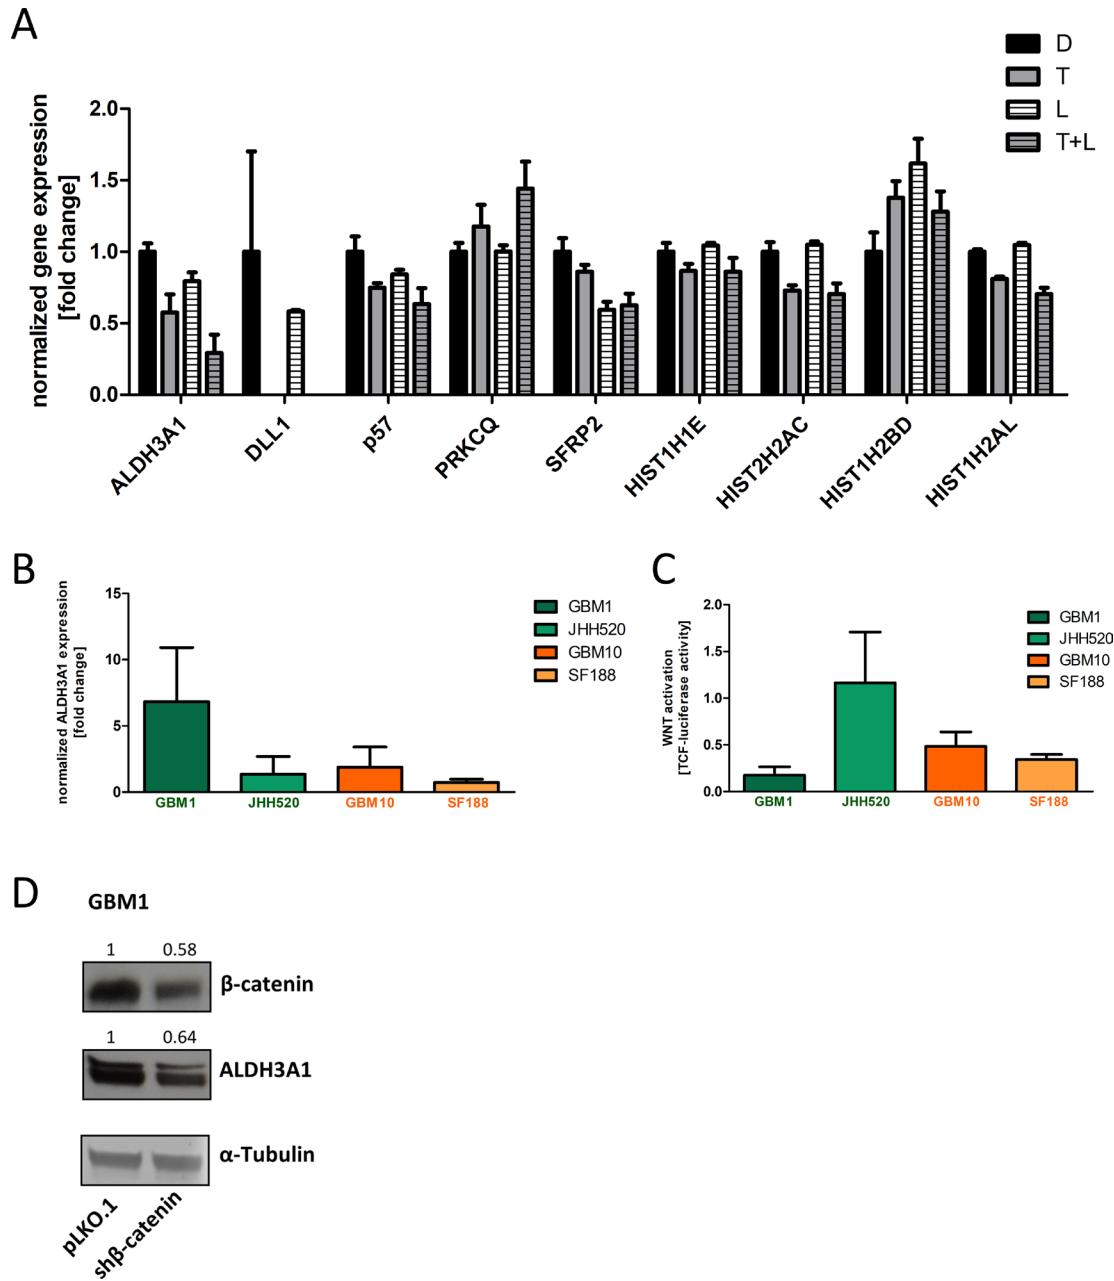

**Supplementary Figure 2:** (A) mRNA expression of 9 genes showing most pronounced differential expression in LGK974 and TMZ treated GBM1 cells as detected by microarray analysis. (B) Basal ALDH3A1 mRNA expression of all four cell lines. (C) Basal Wnt activation of all four cell lines assessed by T cell factor (TCF) luciferase reporters. (D) ALDH3A1 protein expression is reduced in GBM1  $\beta$ -catenin-knock-down cells. pLKO.1 serves as the vector control. Data is presented as mean  $\pm$  standard deviation (SD). D: DMSO; T: TMZ; L: LGK974.

```

1 tttcatgtgt gatgagggtg cattocgtgt ccgtaagat ccaggacggg gcttcccaga
61 ccccaagaga ctggcagtac caacccaagc gtgccctggc atgtcctcct ggcatgcccg
121 ctgtgtccct tccaggatgg ccggggtgtg ggctggctcg cagaggctct gcagctgggg
181 ctgcagccag goggtgactc aggcaggttc cgcctgggct agggaggccc ggcatctctg
241 ctgtgaggct gcccggtcct aactcaacct gacttgcact ttgtgccaat cctgctggcc
301 aggcgtgact agccaggatg gccctagtac ccaactcccc tccagccagc actcatggct
361 tctgccccgc taagatgcc tttgtctgta ctccgacag gcttctctgg agccaggggc
421 tgggctgggg agccacagct tccctgggagc aggaaaagtc aaggagatg gggtaggac
481 tggggcctct gcagcatctt aggggaggct ccccttctgt cgcactcacc tccgtgggct
541 gcaaacctgc agcttctctg acccaaggca ctatgactgg cagcagataa agagatgaag
601 aagccccaga agtcccttcc tacaagtccc cagaaggtgt ggacacagtg gggaaattgc
661 cccgggcaca gccagttctg ctgacttcat gctctccaa agaggggctt tgtaacagta
721 acagagggct ttgtaacaga ctgactgctc ttggctgggc acggtgactg gattacagct
781 ctctgtggcc ttcaactcct gggctcaagc gatcctccca cctcagcttc cccgagttagc
841 tgggactgca ggtgctgccc accacgcccc gcagattttt acattttttg tagagatagc
901 gtcttgctgt gtcaccagc ctggctctca actcctgacc tcaggtgac tcgccgctc
961 ttctctccaa agtgcctggg ttacaggtgt gactcaccgt cctctggctg aactaagtc
1021 gtattatttc tacctaataa tgtgtttgta cgcactaagc aagctctctt tattcccca
1081 cctccccacc cttcccagcc ctggtaacca cegatctatt ctctatcttc atgagatcca
1141 cttgtttggc tcccacacat gagggagaac atgtggcatt tgtcttctct agtcaataaa
1201 cttttaacca acggggaggt cctgagacc cactgcctaa ttttctctct tctactctc
1261 cttttttttt tgagacaggg tctactctgt cactctgtcc cccaggtctg agtgactgg
1321 catgattaca gctcactgaa gcctcgacct cctgggctca agtgatcctc ccgctcagcc
1381 tctcaagtag ctgggtgcat gccaccagc ccagctaat tttttttttt tttttttttg
1441 agatggagtc togctctgccc ctcatccaag ttggaagtga gtggcgcaat ctggctcac
1501 tgcaacctcc acctcccagg ttcaagcgat tctctgctc cagcctcccg agtagctgg
1561 attacagcca tgcaccacca cggccaagta atttttgtat tttagtagag atggggtttt
1621 accatgttgg ccaggctggg cttgaaactc tgagctcaag tgatctgccc gctcaacct
1681 ccaaaagtgc tgggattaca ggcgtgagcc accgcaacca gctcctcttc ttttttttat
1741 tttttttaga gatgagctct tctatgttgc ccaggctcct tctactctga taaagaaagt
1801 ggtttccctc ccaacaacct atatctaatc taaatgttcc ttgaaattta agcaaacctg
1861 ctattcattc attcattcat tcatccaaca ctttttttgc tagctttggg tgaatttctg
1921 gaaaatctgc ttgctaaatg attgcttttc catcagaggg atggttaggt gtagtgggct
1981 gcttccgtat cttcagaggt ctccctgtgt ccaggatag tgctgtaaca aaagttaga
2041 tctctgctct tgtggacatt ccagctcaag ggggaataag gagagacata gtcaacaaaa
2101 caaagatag aacgcaggtt gtgacaggtt cctggaagta aggaaggttt tatttgaggt
2161 gtgagagagg tcaggggaagc tgagatctga acatggataa gagttagtct ggtgcagagt
2221 ggaagaaaaa gtgtcccagg gagcaagaac agcatgtgca aaggccttgt ggtaggaatt
2281 tgccctggta agtcaaggaa tgcacagaga ctggaagtga gtgagaattg tgggaagtgg
2341 tgcgaaagtga ggtgggcaag gcacccagga gccaggccag gcaggggctc acaggccatg
2401 ggaggaagct tctgacagc aagggggtgc cacccaagga tgtgaatcag gggagagaca
2461 tgctcaggtc cttatctgccc gcatgtctct ctggcagcca cttgggaaag gcagctgagc
2521 ctgactcaag gagagttagt agagggcaag aacagtggcc tgggagagag agagttagtg
2581 acagcccagc tgaggatgag gcatgggga tggagtatta ggaactgcaa agattaactc
2641 atgcttgcaa tcccagcact ttggggagct gaggcgggaa gatgaattga gccaggaggt
2701 ttgagaccag cctgggcaac ataatgagac ccatctctac aaaacattta aaaattagct
2761 aggcattggt gtgggttctc gtagtcacaa ggtgggagga tcgcttgagg accggaattc
2821 aaagctgcaa tgagccgtga tggcaccact gcactccaag ctgggcaaca gagcaaacac
2881 ctgtctcaaa aaaaaaaaaa aaaaaagaaa aaagaaaatc tgaaaagcaa gtatctgcaa
2941 gtttctagca caaccacac tcccacactt ttgccactac tgaactata accaaaaacc
3001 aaacacgcaa acaaggattt tgttctctgt agatttgaa tgcttttagg ctctctgctc
3061 tgacgcttcc accactactg ctgccacttt tgatgacacc cacaccacct aacctttcca
3121 ggatgcccctc ggcccgcagc gcactgttct ggtcactctg tgtactcaat gctgtgttgc
3181 tggcttttgc tagttgcttc catggttctc ccaggggagg ccgctgcca caaagaactc
3241 gctccgaatg gctctggccc ttgcattctg cctctactc aagatccaaa tcccaggag
3301 agtcagggag gcctcatggg gagccccccc caaccatgg ctggcctgga gaaggcaact
3361 ggttgatcat ctcaccaagt aggaaggggt tgcctgcaaa gataatcagc tctgcccacc
3421 agaaaagggg agaggtggc acaggtcgg tcttctcccc tctcaggagg caccocactc
3481 tgcacctacc acccagctcca gccctgcac aggtgagagg tctctgagat gcttcttct
3541 gctgtttctg gaatgttccc cattctgtta gtcttattg ggggtctctg catttcttgc
3601 ctgcattgct ggaagctgca gcccttgggc tagaccttcc tcaactgtg cctgttccag
3661 ggggttctct aaaaacaaaa atagcagaca tttgtctgtc tgataatctc ctacgccc
3721 tgcaccacca cagccagcct ggcccacagc cctccgtgag cccccgccc agggagctca
3781 ttcacctcca cacctctgct tggcaacagt ggacacatcg cactttttcg tgacataagc
3841 ttcccagcct ctgtgctctt gcttctgctc ttccagcccc cttgtgttcc cttgcccaca
3901 tgcttctcac tcaagctcaga tgatgttccc tcccacggac tctcaccoca gccctcttag
3961 catcctctgc ctacctggtt actacagtgt tcacattatt ttgaaatttc ctgtttattt
4021 tgtcagctca taaatattta ttgagcatct actataaatg ctgtatggag gttacagacg
4081 tgaacaatc aaattctagc tgtcaggagt taaggacag gtacaaaaa agataaaac
4141 gctccagaga aaaaataatg gaggaagacg acagcattgt gctattttcc acagcacatt
4201 ggagcgttagc cgtgtgggtg gatgtagggg aagggggctc caggtggaga gaagcaggag
4261 ggccagagca catcctcagg actcgtagcc caggaccgga acctgtgttt tctcogaat
4321 gaaatgggaa gcagggacc ccatgctgta agcagctctgc ctgcagcgcg gtgaggggtg
4381 cgggaagcgc ctggtgagag gggccgagag tctgttccac acctgcctcc tcccacagc
4441 gtggtgcaga gcaggagccc agcgaacatt gatcagacag cgtgggaaag gcttttccag
4501 actccttctc tccaagcat ctctggtttt cggtagccac acagaccctt ggccctcttc
4561 tcagctattc aacgagagag cagatttatg gattggagac cccatcaaaa agtcccagc
4621 ctgtgctccc ccagggttag gatctctgac tcaatggggc cctgtgcaac ctgggggatg
4681 tgaagggccc ggggcagcgg ttgctggggg tgcgttctcg gggagctgca tgcctcact
4741 gtggttctgt gctgagccct gccgatctta tgaaccaga gaactcagag aaccgatct
4801 ggcagcggca agtctggaaa gctggaagag ctccatgcca ggtgaaatca atcagcagcc
4861 cccacgcca gggcaaacat aggtcttttt gaagattgga gatgtgccc gccaagcct
4921 tcagaaacat tctcagattt cagaagtga aaaaagcaaa cagccgggga ctaatcccc
4981 aaaaacctgg ctgtagggag

```

**Supplementary Figure 3: Genomic sequence on chromosome 17 (nucleotides 19753433-19748433) with binding sides for TCF in der *ALDH3A1* promoter marked in blue. The sequence was retrieved from NCBI GenBank.**

**Supplementary Table 1: Primer sequences used for qPCR analyses (A) and oligonucleotides used as RNA-targeting sequences for CRISPR/Cas9-mediated knock-down of ALDH3A1**

**A**

| <b>Primer</b>    | <b>fwd</b>               | <b>rev</b>               |
|------------------|--------------------------|--------------------------|
| β2-microglobulin | GTTGCTCCACAGGTAGCTCTAG   | ACAAGCTTTGAGTGCAAGAGATTG |
| ALDH3A1          | TGTTCTCCAGCAACGACAAG     | CTGACCTTCAGGCCTTCATC     |
| P57              | GCTGAACGCCGAGGACCAGAACCG | CGGGCACCGAGTCGCTGTCCACTT |
| DLL1             | TGGCGCAGGCATCGA          | GGCGGCTGATGAGTCTTTCT     |
| PRKCQ            | CTCCCTTATATGGCCCCTGG     | CTTCTGCGATGCCACTGTAC     |
| SFRP2            | TTCCCCAAGCACACTCCTAG     | TACAAGATTCGGGTGGGCTT     |
| HIST1H1E         | CCAAGAAGAGCGCCAAGAAG     | CGCCTTGGGTTTAACTGCTT     |
| HIST2H2AC        | GTGGCAAACAAGGAGGCAAG     | GTCTTCTTGTTGTCCTCCGAGC   |
| HIST1H2BD        | ACCGGCACCTTGATCTTGTA     | GGCTGGGGAGTAAAGAGTGT     |
| HIST1H2AL        | GACAACAAGAAGACCCGCAT     | CTCGGTCTTCTTGGGCAGTA     |
| Sox2             | TGGACAGTTACGCGCACAT      | CGAGTAGGACATGCTGTAGGT    |
| Nestin           | GGCGCACCTCAAGATGTCC      | CTTGGGGTCCTGAAAGCTG      |

**B**

| <b>Oligo</b>  | <b>fwd</b>                | <b>rev</b>                |
|---------------|---------------------------|---------------------------|
| Control       | CACCGGGTGAACCGCATCGAGCTGA | AAACTCAGCTCGATGCGGTTACCC  |
| crALDH3A1     | CACCGTTCGACCATATCCTGTACAC | AAACGTGTACAGGATATGGTCGAAC |
| crALDH3A1 2nd | CACCGGGACACCCCATGATTACT   | AAACAGTAATCAATGGGGGTGTCCC |
